# Supplementary material for: NiCl2 assisted synthesis of ordered mesoporous carbon and a new strategy for a binary catalyst
Source: Royal Society of Chemistry journal article supplement (doi:10.1039/b811076j), 2008-01-01
Supplement: b811076j.pdf [file b811076j.pdf]

Supplementary material (ESI) for Journal of Materials Chemistry  
This journal is © The Royal Society of Chemistry 2008

## **Supplementary Information**

# **NiCl<sub>2</sub> assisted synthesis of ordered mesoporous carbon and a new strategy for a binary catalyst**

**Jianhua Zhou, Jianping He<sup>\*</sup>, Tao Wang, Dun Sun, Guiwang Zhao, Xiu Chen, Daojun Wang  
and Zhiyong Di**

*College of Material Science and Technology, Nanjing University of Aeronautics and Astronautics,  
Nanjing 210016, P. R. China.*

**Table S1** Metal crystal sizes in OMC-NiCl<sub>2</sub>(x) estimated from XRD patterns

|                             | Ni/nm | Pt/nm |
|-----------------------------|-------|-------|
| OMC-NiCl <sub>2</sub> (2%)  | 22.0  | 3.6   |
| OMC-NiCl <sub>2</sub> (5%)  | 23.2  | 4.6   |
| OMC-NiCl <sub>2</sub> (10%) | 26.6  | 4.2   |
| OMC-NiCl <sub>2</sub> (15%) | 26.0  | 3.4   |
| OMC-NiCl <sub>2</sub> (20%) | 27.8  | 3.3   |

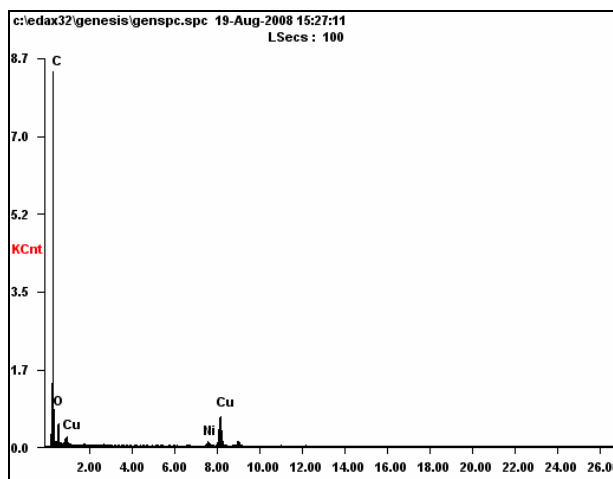

| <i>Elem</i> | <i>Weight %</i> | <i>Atomic %</i> |
|-------------|-----------------|-----------------|
| <i>C K</i>  | 68.10           | 87.20           |
| <i>O K</i>  | 07.00           | 06.70           |
| <i>NiK</i>  | 02.50           | 00.70           |
| <i>CuK</i>  | 22.40           | 05.40           |

**Figure S1** EDS of OMC-NiCl<sub>2</sub>(15%). No signal ascribed to Si is detected. It indicates that silica has been removed by NaOH completely.

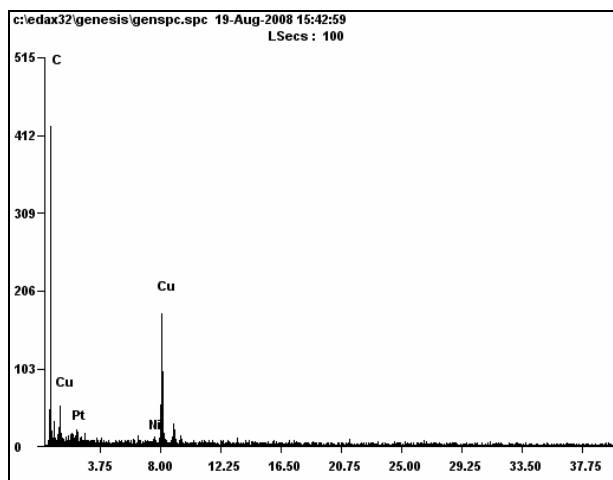

| <i>Elem</i> | <i>Weight %</i> | <i>Atomic %</i> |
|-------------|-----------------|-----------------|
| <i>C K</i>  | 33.60           | 73.00           |
| <i>O K</i>  | 02.80           | 04.50           |
| <i>PtM</i>  | 13.20           | 01.80           |
| <i>NiK</i>  | 02.40           | 01.00           |
| <i>CuK</i>  | 48.00           | 19.70           |

**Figure S2** EDS of OMC-NiCl<sub>2</sub>(15%) after loading with Pt nanoparticles. It suggests that a binary catalyst is comprised of the Ni and Pt nanoparticles.
